# Supplementary material for: Performance Testing of Optical Flow Time Series Analyses Based on a Fast, High-Alpine Landslide
Source: MDPI journal article supplement (doi:10.3390/rs14030455), 2022-01-18
Supplement: s1 [file s1]

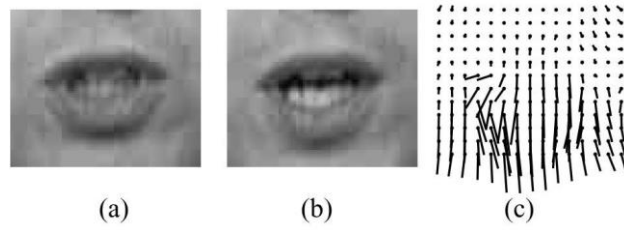

**Figure S1.** An example of optical flow to estimate mouth motion. Two consecutive images show regions of a mouth in motion (a, b) and the estimated flow field using dense optical flow method (c) [adapted from Fleet\_etal\_2000].
